# Supplementary material
Source: HighWire-hosted journal article supplement (https://www.cmaj.ca/highwire/filestream/74425/field_highwire_adjunct_files/0/190597-com-1-at.pdf)

**Appendix 1 (as submitted by the authors): The Neurosciences, Rehabilitation & Vision Strategic Clinical Network**

**Neurosciences, Rehabilitation & Vision Strategic Clinical Network**

**Transformational Roadmap Summary**

**AHS VISION:** Healthy Albertans. Healthy Communities. Together.

**NRV SCN MISSION:** Improving how Albertans see, think, and live.

|                             | 1                                                                                                                                                                                                                                                                                                            | 2                                                                                                                                                                                                                                                                                                                           | 3                                                                                                                                                                                        | 4                                                                                                                                                                                                                                             |
|-----------------------------|--------------------------------------------------------------------------------------------------------------------------------------------------------------------------------------------------------------------------------------------------------------------------------------------------------------|-----------------------------------------------------------------------------------------------------------------------------------------------------------------------------------------------------------------------------------------------------------------------------------------------------------------------------|------------------------------------------------------------------------------------------------------------------------------------------------------------------------------------------|-----------------------------------------------------------------------------------------------------------------------------------------------------------------------------------------------------------------------------------------------|
| <b>STRATEGIC DIRECTIONS</b> | Improving clinical practice through research & innovation                                                                                                                                                                                                                                                    | Integrating care across the patient journey                                                                                                                                                                                                                                                                                 | Supporting evidence-informed decision making                                                                                                                                             | Ensuring timely and equitable access to care across the continuum                                                                                                                                                                             |
| <b>PRIORITIES</b>           | <ul style="list-style-type: none"> <li>Understand patient experience and determine areas to focus and improve clinical practice</li> <li>Explore current situation and opportunities for vision rehab in Alberta</li> <li>Explore applications for innovative therapeutic treatments in NVR areas</li> </ul> | <ul style="list-style-type: none"> <li>Develop and implement standardized evidence-informed provincial clinical pathways/care delivery systems</li> <li>Improve transitions in care for patients and families</li> <li>Identify and build partnerships and resources to better support patients in the community</li> </ul> | <ul style="list-style-type: none"> <li>Identify, implement, and monitor standardized quality indicators in NRV areas</li> <li>Ensure appropriateness of testing and therapies</li> </ul> | <ul style="list-style-type: none"> <li>Understand care gaps for equitable access</li> <li>Access care closer to home by exploring opportunities to better utilize virtual care</li> <li>Implement central access to specialty care</li> </ul> |

|                   |                    |                                |                  |                              |                             |                        |                                |
|-------------------|--------------------|--------------------------------|------------------|------------------------------|-----------------------------|------------------------|--------------------------------|
| <b>PRINCIPLES</b> | Culture of Quality | Patient & Family Centered Care | Provincial Focus | Evidence-informed            | Innovation & Transformation | Research               | Outcomes Focus                 |
| <b>ENABLERS</b>   | Partnerships       | Communication                  | Technology       | Patient & Provider Education | Healthcare Equity           | Implementation Science | Data & Performance Measurement |

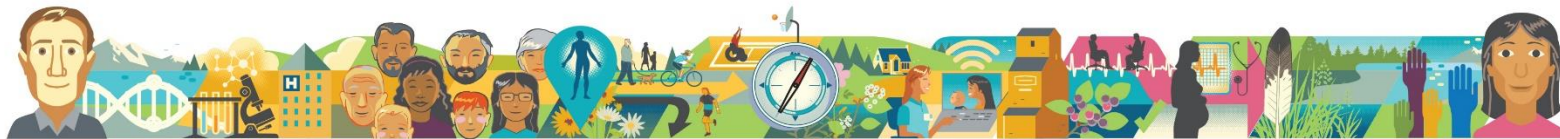

Supplement: 190597-com-1-at.pdf [file 190597-com-1-at.pdf]
